# Supplementary material
Source: MDPI journal article supplement (https://www.mdpi.com/2073-4441/12/12/3383)
Supplement: s1 [file s1 › water-962009-supplementary.pdf]

## LIST OF FIGURES

- Figure SM-1.** Examples of observed and simulated flow around aerated oxidant candles in narrow and wide flow boxes along with simulated oxidant flow (Kambhu, 2019).
- Figure SM-2.** (A) Schematic of non-reloadable aerated, slow-release oxidant deployed by direct-push equipment for Freemont Site; (B) Schematic of reloadable aerated, slow-release oxidant deployed by direct-push equipment for Textron and Hoover Sites.
- Figure SM-3.** Schematic of wide flow box used to compare liquid oxidant versus aerated oxidant candles during transport.
- Figure SM-4.** Temporal changes in 1,4-dioxane concentrations following installation of permanganate oxidant candles followed by persulfate oxidant candles at the Hoover site.

**Table SM-1. Laboratory results from treatability experiments using groundwater from SG-10 (Freeman site) and oxidant candles.**

|                            | Control | Control | Wax    | ZVI    | Persulfate | Permanganate | Persulfate<br>+ ZVI |
|----------------------------|---------|---------|--------|--------|------------|--------------|---------------------|
| Compound                   | (24 h)  | (14 d)  | Candle | Candle | Candle     | Candle       | Candle              |
|                            | µg/L    |         |        |        |            |              |                     |
| Naphthalene                | 478     | 260     | <100   | <100   | 143        | <100         | <100                |
| Toluene                    | 1,184   | 380     | <100   | 334    | 239        | 394          | <100                |
| 1,2,4-<br>Trimethylbenzene | 1,036   | 1,085   | <100   | <100   | 283        | <100         | <100                |
| 1,3,5<br>Trimethylbenzene  | 232     | 338     | <100   | <100   | <100       | <100         | <100                |
| Total Xylenes              | 5,886   | 5,400   | 617    | 1,588  | 998        | 486          | <100                |
| Ethylbenzene               | 1,518   | <100    | <100   | <100   | 308        | <100         | <100                |
| Vinyl Acetate              | 4,136   | <500    | <500   | <500   | <500       | <500         | <500                |

**Table SM-2. Treatability results showing changes in contaminant concentrations of Hoover Site groundwater following treatment with miniature permanganate oxidant candles for 14 d.**

| Compound <sup>†</sup>  | Concentration (µg L <sup>-1</sup> ) |                |               | Percent Reduction of Oxidant Candle over |                |
|------------------------|-------------------------------------|----------------|---------------|------------------------------------------|----------------|
|                        | Oxidant                             |                |               | Control (24 h)                           | Control (14 d) |
|                        | Control (24 h)                      | Control (14 d) | Candle (14 d) |                                          |                |
| Acetone                | <100                                | <100           | 1450          | NA‡                                      | NA             |
| Benzene                | 191                                 | 217            | 139           | 27.2%                                    | 35.9%          |
| 2-Butanone             | <100                                | <100           | 203           | NA                                       | NA             |
| Chloroform             | 13.6                                | 13             | <1.00         | >92.7%                                   | >92.3%         |
| 1,1-Dichloroethane     | 438                                 | 474            | 349           | 20.3%                                    | 26.4%          |
| 1,2-Dichloroethane     | <10.0                               | 16.4           | 11.2          | NA                                       | 31.7%          |
| 1,1-Dichloroethene     | 270                                 | 297            | <2.00         | >99.3%                                   | >99.3%         |
| cis-1,2-Dichloroethene | 254                                 | 266            | <1.00         | >99.6%                                   | >99.6%         |
| Ethylbenzene           | 106                                 | 103            | <1.00         | >99.1%                                   | >99.0%         |
| Hexane                 | 136                                 | 91.1           | <1.00         | >99.3%                                   | >98.9%         |
| Isopropylbenzene       | 21.3                                | 18.7           | <1.00         | >95.3%                                   | >94.7%         |
| N-Propylbenzene        | 37.1                                | 33             | <1.00         | >97.3%                                   | >96.9%         |
| Tetrachloroethene      | 945                                 | 1040           | <1.00         | >99.9%                                   | >99.9%         |
| Toluene                | 36.3                                | 43.3           | <1.00         | >97.3%                                   | >97.7%         |
| 1,1,1-Trichloroethane  | 66.9                                | 70.7           | 42.9          | 35.9%                                    | 39.3%          |
| 1,1,2-Trichloroethane  | <10.0                               | <10.0          | 4.93          | NA                                       | NA             |
| Trichloroethene        | 130                                 | 135            | <1.00         | >99.2%                                   | >99.3%         |
| 1,2,4-Trimethylbenzene | 67                                  | 50.6           | <1.00         | >98.5%                                   | >98.0%         |
| 1,3,5-Trimethylbenzene | 15.8                                | 12.7           | <1.00         | >93.7%                                   | >92.1%         |
| Vinyl chloride         | 95                                  | 99             | <1.00         | >98.9%                                   | >98.9%         |
| Xylenes, Total         | 33.1                                | 30.5           | <3.00         | >90.9%                                   | >90.2%         |
| 1,4-Dioxane            |                                     | 493            | 277           |                                          | 43.8%          |

† All analytes were determined using EPA Method 8260C except 1,4-dioxane, which was analyzed by EPA Method 8260C SIM

‡ NA, not applicable, concentrations increased following treatment.

**Table SM-3. Acetone and 2-butanone analysis following wax-oxidant  
14 d incubations.**

| Treatment               | Acetone         | 2-butanone |
|-------------------------|-----------------|------------|
|                         | μg/L            |            |
| Water (Control)         | ND <sup>†</sup> | ND         |
| Wax + Water             | ND              | ND         |
| Wax + Persulfate + Iron | 344             | 30.1       |
| Wax + Permanganate      | 189             | 25         |

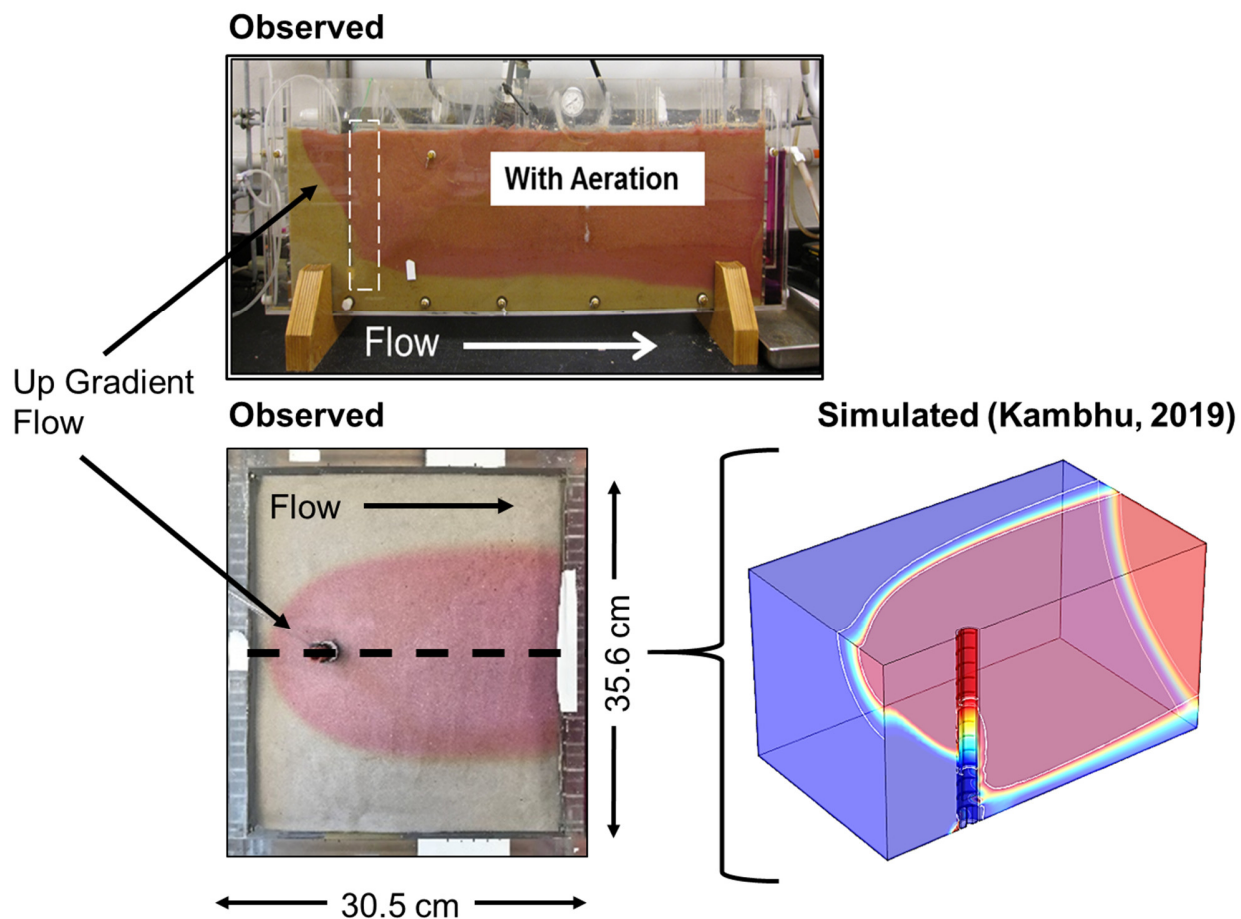

**Figure SM-1.** Examples of observed and simulated flow around aerated oxidant candles including examples of up gradient flow in narrow and wide flow boxes along with simulated oxidant flow (Kambhu, 2019; Kambhu et al. 2021).

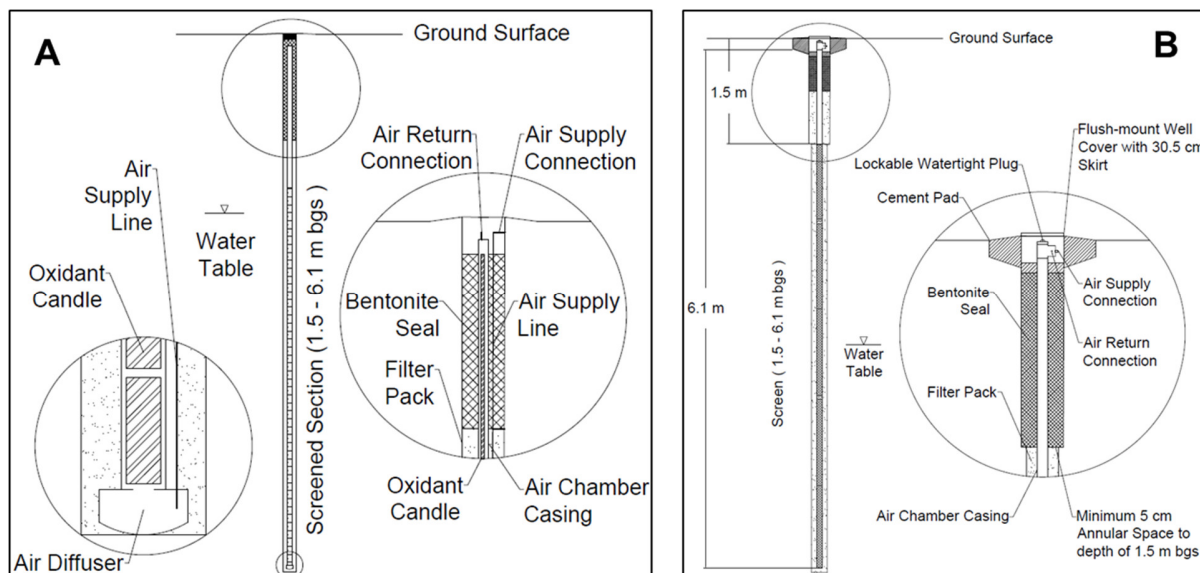

**Figure SM-2.** (A) Schematic of non-reloadable aerated, slow-release oxidant deployed by direct-push equipment for Freemont Site; (C) Schematic of reloadable aerated, slow-release oxidant deployed by direct-push equipment for Textron and Hoover Sites.

### Schematic of Wide Flow Box

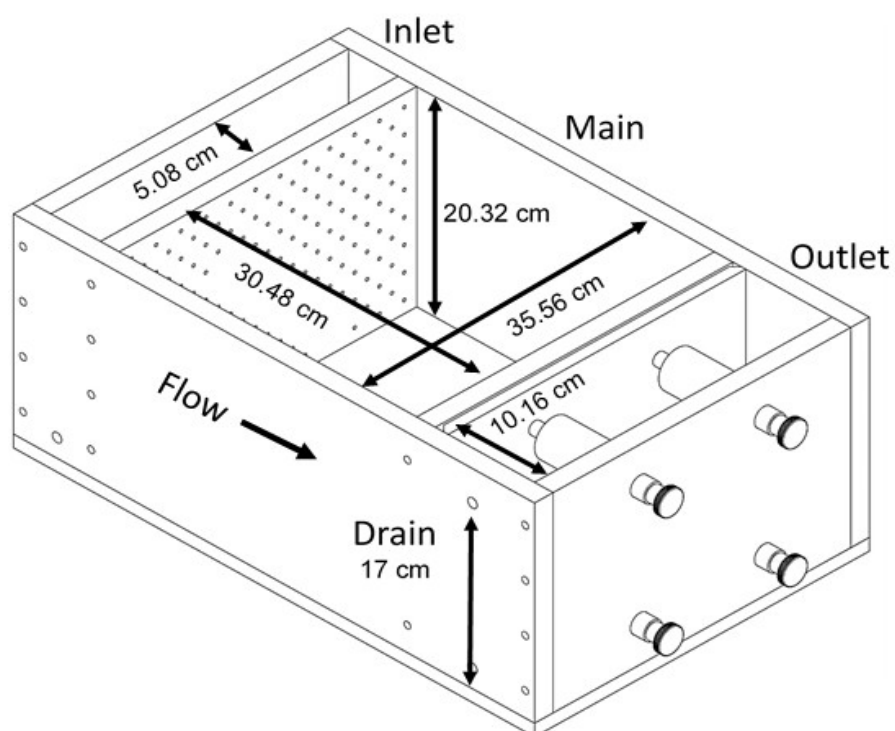

**Figure SM-3.** Schematic of wide flow box used to compare liquid oxidant versus aerated oxidant candles during transport.

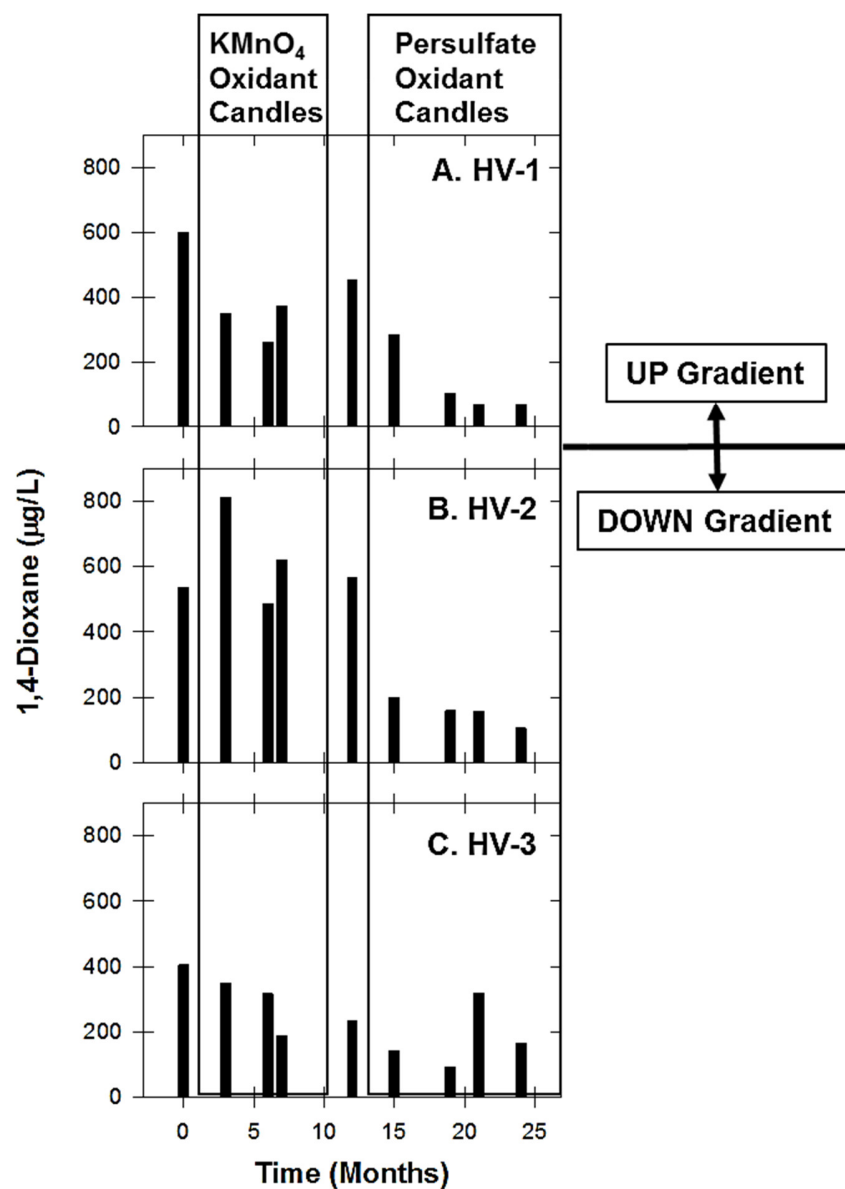

**Fig. SM-4.** Temporal changes in 1,4-dioxane concentrations following installation of permanganate oxidant candles and persulfate oxidant candles at Hoover site.
